# Supplementary material for: Controlling Dengue with Vaccines in Thailand
Source: PLOS journal article supplement (doi:10.1371/journal.pntd.0001876), 2012-10-25
Supplement: S1 (10.1371/journal.pntd.0001876.s001) [file journal.pntd.0001876.s001]

**A**

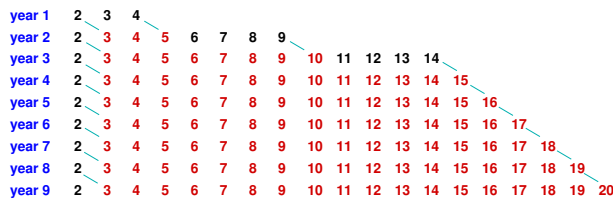

**B**

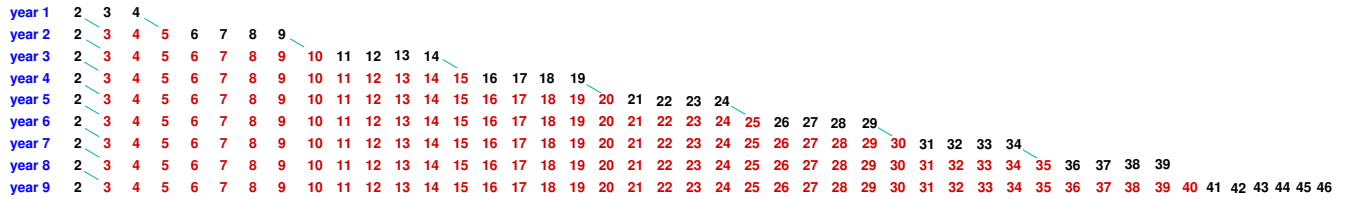

**Figure S1. Diagram of how vaccine roll-out occurs in the model.** In the model, we target a set of age cohorts each year for vaccination. The numbers in the diagrams indicate the ages of the population cohorts in years. The numbers in black in each row indicate the cohorts targeted each year, while the numbers in red indicate those already protected by vaccine from previous years. The set of individuals who are protected advance in age each year, so the youngest eligible cohort (2-year-olds) needs to be vaccinated every year. (A) A roll-out that covers only children from ages 2 to 14 years. (B) A roll-out that covers both children and adults from ages 2 to 46 years.
