# Supplementary material for: Controlling Dengue with Vaccines in Thailand
Source: PLOS journal article supplement (doi:10.1371/journal.pntd.0001876), 2012-10-25
Supplement: S4 (10.1371/journal.pntd.0001876.s004) [file journal.pntd.0001876.s004]

PLOS Neglected Tropical Diseases


Skip to main content

Advertisement

# PLOS Neglected Tropical Diseases

- Browse 
  - Current Issue
  - Journal Archive
  - Collections
  - Find and Read Articles
- Publish

  - Submissions 
    - Getting Started
    - Submission Guidelines
    - Figures
    - Tables
    - Supporting Information
    - LaTeX
    - Other Article Types
    - Preprints
    - Revising Your Manuscript
    - Submit Now
  - Policies 
    - Best Practices in Research Reporting
    - Human Subjects Research
    - Animal Research
    - Competing Interests
    - Disclosure of Funding Sources
    - Licenses and Copyright
    - Data Availability
    - Complementary Research
    - Materials, Software and Code Sharing
    - Ethical Publishing Practice
    - Authorship
    - Corrections, Expressions of Concern, and Retractions
  - Manuscript Review and Publication 
    - Editorial and Peer Review Process
    - Guidelines for Reviewers
    - Guidelines for Editors
    - Accepted Manuscripts
    - Comments

  ### Submit Your Manuscript

  *PLOS Neglected Tropical Diseases* is the top Open Access tropical medicine journal, featuring an International Editorial Board and increased support for developing country authors.

  Get Started
- About 
  - Journal Information
  - Editors-in-Chief
  - Editorial Board
  - Publishing Information
  - Publication Fees
  - Press and Media
  - Contact
- Search
  Search


  advanced search


April 4, 2024

# Citizens can help to map putative transmission sites for snail-borne diseases

Image credit: Museum national d'Histoire naturelle

### Calling all experts!

#### PLOS Neglected Tropical Diseases is seeking talented individuals to join our editorial board

Apply now

03/21/2024

Viewpoints

## Amidst spreading infectious diseases and climate change, US FDA should renew its focus on neglected tropical diseases

In 2015, the United States Food and Drug Administration (US FDA) and other Department of Health and Human Services agencies helped respond to a public health emergency concerning Zika Virus during which 5,600 cases of the virus were reported in the United States mainland and 37,000 cases in Puerto Rico and other US Territories. In June 2023, the...

Image credit: US Defense Visual Information Distribution Service

### Recently Published Articles

- Climate-driven models of leptospirosis dynamics in tropical islands from three oceanic basins
- Live-attenuated CHIKV vaccine with rearranged genome replicates *in vitro* and induces immune response in mice
- Unravelling *Chlamydia trachomatis* diversity in Amhara, Ethiopia: MLVA-*ompA* sequencing as a molecular typing tool for trachoma

See all articles

Current Issue March 2024

03/25/2024

Research Article

## Chitosan nanoparticles improve the effectivity of miltefosine against *Acanthamoeba*

*Acanthamoeba keratitis* (AK) is a corneal sight-threatening infection caused by the free-living amoebae of the genus *Acanthamoeba*. Early and appropriate treatment significantly impacts visual outcomes. Mucoadhesive polymers such as chitosan are a potential strategy to prolong the residence time and bioavailability of the encapsulated drugs in the cornea...

Image credit: pntd.0011976

03/14/2024

Research Article

## Successful introgression of *w*Mel *Wolbachia* into *Aedes aegypti* populations in Fiji, Vanuatu and Kiribati

Pacific Island countries have experienced periodic dengue, chikungunya and Zika outbreaks for decades. The prevention and control of these mosquito-borne diseases rely heavily on control of *Aedes aegypti* mosquitoes, which in most settings are the primary vector. Introgression of the intracellular bacterium *Wolbachia pipientis*...

Image credit: pntd.0012022

03/27/2024

Research Article

## Small Intestine Bacterial Overgrowth is associated with increased *Campylobacter* and epithelial injury in duodenal biopsies of Bangladeshi children

Small intestine bacterial overgrowth (SIBO) has been associated with enteric inflammation, linear growth stunting, and neurodevelopmental delays in children from low-income countries. Little is known about the histologic changes or epithelial adherent microbiota...

Image credit: CDC

03/29/2024

Research Article

## Mixed methods to evaluate knowledge, attitudes and practices (KAP) towards rabies in central and remote communities of Moramanga district, Madagascar

Control of dog-mediated rabies relies on raising awareness, access to post-exposure prophylaxis (PEP) and mass dog vaccination. To assess rabies...

Image credit: pntd.0012064

04/01/2024

Research Article

## Biased virus transmission following sequential coinfection of *Aedes aegypti* with dengue and Zika viruses

Mosquito-borne arboviruses are expanding their territory and elevating their infection prevalence due to the rapid climate change, urbanization, and increased international travel and global trade. Various significant arboviruses, including the dengue virus, Zika virus, Chikungunya virus, and yellow fever virus...

Image credit: pntd.0012053

03/28/2024

Research Article

## Human myiasis in Sub-Saharan Africa: A systematic review

Jallow and colleagues

Image credit: pntd.0012027

04/04/2024

Research Article

## Snakebite envenoming: A systematic review and meta-analysis of global morbidity and mortality

Afroz and colleagues

Image credit: pntd.0012080

04/05/2024

Research Article

## Protoplast-mediated transformation of *Madurella mycetomatis* using hygromycin resistance as a selection marker

du Pré and colleagues

Image credit: pntd.0012092

04/05/2024

Research Article

## Transcriptional signatures in human macrophage-like cells infected by *Leishmania infantum*, *Leishmania major* and *Leishmania tropica*

Diotallevi and colleagues

Image credit: pntd.0012085

Calling all experts!

- ### *PLOS Neglected Tropical Diseases* is seeking talented individuals to join our editorial board

  Click here to apply now
- ### Click to learn more about the roles and responsibilities of our Academic Editors

of

Front Matter Articles

- ### Vector-borne pathogen surveillance in a metagenomic world
- ### Progress interrogating TRPMPZQ as the target of praziquantel
- ### The use of artificial intelligence to improve mycetoma management
- ### A lesion in two: Buruli ulcer and squamous cell carcinoma coexistence
- ### Unraveling the role of miRNAs as biomarkers in Chagas cardiomyopathy: Insights into molecular pathophysiology

of

### Publish with PLOS

- Submission Instructions
- Submit Your Manuscript

### Connect with Us

- Contact Us
- RSS
- PLOS Neglected Tropical Diseases on Twitter
- PLOS on Facebook
- PLOS Blogs

Tweets by @plosntds

## Get new content from PLOS Neglected Tropical Diseases in your inbox

PLOS will use your email address to provide content from PLOS Neglected Tropical Diseases.
You can find out more about how PLOS processes your data by reading our
Privacy Policy.
You can unsubscribe at any time by clicking the unsubscribe link in our emails or by contacting us at privacy@plos.org.

Sign up

## Thank you! You have successfully subscribed to the PLOS Neglected Tropical Diseases newsletter.

## Sorry, an error occurred while sending your subscription. Please try again later.

Try again

PLOS Neglected Tropical Diseases | ISSN: 1935-2735 (online)


- Publications
- PLOS Biology
- PLOS Climate
- PLOS Complex Systems
- PLOS Computational Biology
- PLOS Digital Health
- PLOS Genetics
- PLOS Global Public Health

- PLOS Medicine
- PLOS Mental Health
- PLOS Neglected Tropical Diseases
- PLOS ONE
- PLOS Pathogens
- PLOS Sustainability and Transformation
- PLOS Water

- Home
- Blogs
- Collections
- Give feedback
- LOCKSS

- Privacy Policy
- Terms of Use
- Advertise
- Media Inquiries
- Contact

PLOS is a nonprofit 501(c)(3) corporation, #C2354500, based in San Francisco, California, US
